# Supplementary material for: Polish and New Zealand Propolis as Sources of Antioxidant Compounds Inhibit Glioblastoma (T98G, LN-18) Cell Lines and Astrocytoma Cells Derived from Patient
Source: MDPI journal article supplement (doi:10.3390/antiox11071305), 2022-06-29
Supplement: s1 [file s1]

**Table S1.** Chemical composition of the ethanolic extracts of propolis from Poland (PPE) and New Zealand (MPE).

| Components                                      | CAS        | I <sub>T</sub> <sup>Exp</sup> | I <sub>T</sub> <sup>Lit</sup> | PPE<br>[%]  | MPE<br>[%]  |
|-------------------------------------------------|------------|-------------------------------|-------------------------------|-------------|-------------|
| Benzyl alcohol, mono-TMS                        | 14642-79-6 | 1152                          | 1155                          | trace*      | 0.09        |
| 2-Phenyl ethanol, mono-TMS                      | 14629-58-4 | 1225                          | 1227                          | trace       | 0.04        |
| Benzoic acid, mono-TMS                          | 2078-12-8  | 1244                          | 1247                          | <b>1.80</b> | 0.33        |
| Diethylene glycol, di-TMS? (73,117,103,147,191) | 16654-74-3 | 1250                          | 1239                          | -           | 0.07        |
| H <sub>3</sub> PO <sub>4</sub> , tri-TMS        | 10497-05-9 | 1289                          | 1289                          | -           | 0.02        |
| Glycerol, tri-TMS                               | 6787-10-6  | 1291                          | 1293                          | 0.22        | 0.57        |
| Succinic acid, di-TMS                           | 40309-57-7 | 1321                          | 1324                          | -           | trace       |
| Ethyl dihydrocinnamate                          | 2021-28-5  | 1345                          | 1349                          | -           | trace       |
| Hydroquinone, di-TMS                            | 2117-24-0  | 1406                          | 1410                          | 0.04        | trace       |
| 3-Hydroxy acid, di-TMS? (147,73,103,233)        | -          | 1410                          | -                             | -           | trace       |
| Hydrocinnamic acid, mono-TMS                    | 21273-15-4 | 1414                          | 1418                          | trace       | 0.06        |
| Cinnamoyl alcohol, mono-TMS                     | N/A**      | 1425                          | 1427                          | trace       | 0.03        |
| 3-Hydroxy acid, di-TMS? (73,131,147,233)        | -          | 1461                          | -                             | -           | 0.02        |
| 4'-Hydroxyacetophenone, mono-TMS                | 18803-29-7 | 1467                          | 1471                          | -           | trace       |
| Malic acid, tri-TMS                             | 38166-11-9 | 1507                          | 1511                          | -           | 0.03        |
| Vanillin, mono-TMS                              | 6689-43-6  | 1534                          | 1533                          | trace       | trace       |
| Erythritol, tetra-TMS                           | 25258-02-0 | 1536                          | 1535                          | -           | 0.06        |
| Cinnamic acid, mono-TMS                         | 2078-20-8  | 1542                          | 1546                          | 0.20        | <b>1.82</b> |
| 7-Phenyl-5-hepten-2-one? (130,129,91)           | 33046-89-6 | 1567                          | -                             | -           | 0.03        |
| Protocatechuic aldehyde, di-TMS                 | N/A        | 1619                          | 1620                          | trace       | 0.07        |
| NN (73>130,75,233,248)                          | -          | 1626                          | -                             | -           | 0.15        |
| 4-Hydroxybenzoic acid, di-TMS                   | 2078-13-9  | 1632                          | 1636                          | 0.16        | 0.03        |
| Docosanoic acid, mono-TMS                       | 55520-95-1 | 1661                          | 1658                          | trace       | -           |
| Guaiol, mono-TMS                                | N/A        | 1682                          | 1685                          | trace-      | 0.07        |
| Acorenol, mono-TMS                              | N/A        | 1720                          | 1723                          | -           | 0.02        |
| Agarospinol, mono-TMS                           | N/A        | 1737                          | 1734                          | -           | 0.01        |
| γ-Eudesmol, mono-TMS                            | N/A        | 1740                          | 1739                          | -           | 0.11        |

|                                                                            |            |      |      |             |       |
|----------------------------------------------------------------------------|------------|------|------|-------------|-------|
| $\alpha$ -Bisabolol, mono-TMS                                              | N/A        | 1747 | 1752 | trace       | 0.05  |
| $\beta$ -Eudesmol, mono-TMS                                                | N/A N/A    | 1749 | 1751 | -           | 0.09  |
| Arabinitol, penta-TMS                                                      | 25138-28-7 | 1755 | 1760 | -           | 0.07  |
| Benzyl benzoate                                                            | 120-51-4   | 1764 | 1763 | 0.29        | -     |
| Vanillic acid, di-TMS                                                      | 2078-15-1  | 1776 | 1776 | trace       | -     |
| (Z)- <i>p</i> -Coumaric acid, di-TMS                                       | N/A        | 1799 | 1798 | 0.12        | -     |
| Methylfuranoside, tetra-TMS                                                | 30788-71-7 | 1811 | 1813 | -           | 0.11  |
| <i>p</i> -Methoxycinnamic acid, mono-TMS                                   | 25436-23-1 | 1827 | 1830 | -           | 0.11  |
| Cinnamylideneacetic acid, mono-TMS                                         | N/A        | 1835 | 1840 | trace       | 0.63  |
| $\alpha$ -Fructofuranose, penta-TMS                                        | N/A        | 1841 | 1845 | 0.26        | 0.69  |
| $\beta$ -Fructofuranose, penta-TMS                                         | N/A        | 1850 | 1854 | 3.67        | 7.32  |
| $\alpha$ -Mannofuranose, penta-TMS                                         | N/A        | 1872 | 1874 | -           | 0.35  |
| $\alpha$ -Glucufuranose, penta-TMS                                         | 66807-66-7 | 1884 | 1885 | -           | 0.11  |
| NN (73,131,204,368,203)                                                    | -          | 1896 | -    | -           | 0.06  |
| $\alpha$ -Glucopyranose, penta-TMS                                         | N/A        | 1929 | 1930 | 0.91        | 4.02  |
| <i>p</i> -Coumaric acid, di-TMS                                            | 10517-30-3 | 1944 | 1947 | <b>9.77</b> | 0.87  |
| SesquiterpenolC <sub>15</sub> H <sub>26</sub> O-TMS?<br>(131>73...279,103) | -          | 1948 | -    | -           | 0.26  |
| NN (131,73,249,179...399,355)                                              | -          | 1956 | -    | -           | 0.04  |
| Mannitol, hexa-TMS                                                         | 14317-07-8 | 1970 | 1972 | -           | 0.04  |
| Sedoheptulose, hexa-TMS                                                    | 74987-26-0 | 1974 | 1972 | -           | 0.16  |
| Ethyl hexadecanoate                                                        | 628-97-7   | 1990 | 1994 | -           | 0.03  |
| NN (73,147,289,248,319...379)                                              | -          | 2007 | -    | -           | 0.05  |
| $\beta$ -Glucopyranose, penta-TMS                                          | 2775-90-8  | 2028 | 2032 | 0.99        | 5.25  |
| 3,4-Dimethoxycinnamic acid, mono-TMS                                       | 27750-71-6 | 2030 | 2034 | -           | 1.51  |
| Gluconic acid, hexa-TMS                                                    | 34290-52-3 | 2041 | 2045 | -           | 0.04  |
| Hexadecanoic acid, mono-TMS                                                | 55520-89-3 | 2049 | 2052 | 0.27        | 0.11  |
| (E)-1,4-Diphenyl-3-buten-1-one                                             | 32363-55-6 | 2072 | -    | -           | trace |
| Isoferulic acid, di-TMS                                                    | 32342-04-4 | 2087 | 2088 | 0.95        | 0.82  |
| Ethyl caffeate, di-TMS                                                     | N/A        | 2092 | 2091 | -           | 0.04  |

|                                                             |            |      |      |             |             |
|-------------------------------------------------------------|------------|------|------|-------------|-------------|
| NN (131,73>162,143)                                         | -          | 2096 | -    | -           | 0.26        |
| ( <i>E</i> )-Ferulic acid, di-TM                            | 10517-09-6 | 2101 | 2101 | <b>3.22</b> | 0.15        |
| <i>myo</i> -Inositol, hexa-TMS                              | 2582-79-8  | 2124 | 2125 | trace       | 0.04        |
| NN (73>157,156)                                             | -          | 2148 | -    | -           | 0.06        |
| 3-Methylbutanyl ( <i>E</i> )- <i>p</i> -coumarate, mono-TMS | N/A        | 2152 | 2145 | 0.65        | -           |
| ( <i>E</i> )-Caffeic acid, di-TMS                           | 10586-03-5 | 2155 | 2155 | <b>2.10</b> | <b>1.53</b> |
| 3-Methyl-3-butenyl <i>p</i> -coumarate, mono-TMS            | N/A        | 2159 | 2159 | 0.18        | 0.11        |
| NN (247>73,131...358)                                       | -          | 2169 | -    | -           | 0.10        |
| 2-Methyl-2-butenyl <i>p</i> -coumarate, mono-TMS            | N/A        | 2205 | 2201 | 0.97        | trace       |
| 3-Methyl-2-butenyl <i>p</i> -coumarate, mono-TMS            | N/A        | 2212 | 2216 | 0.23        | 0.07        |
| Linoleic acid, mono-TMS                                     | 56259-07-5 | 2217 | 2215 | trace       | 0.03        |
| Oleic acid, mono-TMS                                        | 21556-26-3 | 2222 | 2222 | 0.33        | 0.21        |
| NN (73>156,244,143,93,147...381)                            | -          | 2234 | -    | 1.31        | 0.17        |
| Octadecanoic acid, mono-TMS                                 | 18748-91-9 | 2249 | 2252 | trace       | 0.06        |
| 3-Methyl-3-butenyl isoferulate, mono-TMS                    | N/A        | 2303 | 2304 | -           | 0.38        |
| 3-Methyl-3-butenyl ( <i>E</i> )-ferulate, mono-TMS          | N/A        | 2318 | 2319 | 0.07        | 0.16        |
| Benzyl ( <i>Z</i> )- <i>p</i> -coumarate, mono-TMS          | N/A        | 2323 | 2329 | 0.07        | -           |
| Eicosanoic acid, mono-TMS                                   | 55530-70-6 | 2349 | 2349 | -           | 0.03        |
| NN (335,73,446,147,69,41,147)                               | -          | 2346 | -    | -           | 0.04        |
| 3-Methylbutanyl ( <i>E</i> )-caffeate, di-TMS               | N/A        | 2358 | 2358 | 0.06        | 0.15        |
| 3-Methyl-2-butenyl ( <i>E</i> )-isoferulate, mono-TMS       | N/A        | 2365 | 2365 | -           | 0.05        |
| 3-Methyl-3-butenyl ( <i>E</i> )-caffeate, di-TMS            | N/A        | 2371 | 2367 | <b>1.18</b> | <b>3.39</b> |
| 3-Methyl-2-butenyl ( <i>E</i> )-caffeate, di-TMS            | N/A        | 2374 | 2375 | 0.50        | 0.44        |
| NN (397,369,73,91)                                          | -          | 2384 | -    | -           | 0.03        |
| Pinostrobin chalcone                                        | 18956-15-5 | 2392 | -    | 0.16        | 0.07        |
| NN (73,75,55,143,207,129,41)                                | -          | 2404 | -    | -           | 0.02        |
| Cinnamyl cinnamate                                          | 122-69-0   | 2408 | 2391 | -           | 0.29        |
| 2-Methyl-2-butenyl ( <i>E</i> )-caffeate, di-TMS            | N/A        | 2414 | 2413 | 0.09        | 0.24        |
| 2',6'-Dihydroxy-4'-methoxydihydrochalcone,di-TMS            | N/A        | 2418 | 2416 | 0.46        | 0.02        |

|                                                         |          |      |      |             |              |
|---------------------------------------------------------|----------|------|------|-------------|--------------|
| 3-Methyl-2-butenyl ( <i>E</i> )-caffeate, di-TMS        | N/A      | 2425 | 2421 | <b>1.65</b> | <b>2.36</b>  |
| NN (143,73,81,95,121,151)                               | -        | 2444 | -    | -           | 0.02         |
| NN (287,372,357,263,73)                                 | -        | 2450 | -    | -           | 0.18         |
| NN (262,73,247,460,375,287,445)                         | -        | 2452 | -    | -           | 0.25         |
| Pinocembrin, mono-TMS                                   | N/A      | 2460 | 2461 | 1.14        | 0.46         |
| 2',6', $\alpha$ -Trihydroxy-4'-methoxychalcone, tri-TMS | N/A      | 2491 | 2492 | 0.14        | -            |
| ( <i>Z</i> )-Coniferyl benzoate, mono-TMS               | N/A      | 2494 | 2495 | -           | 0.15         |
| <i>n</i> -Pentacosane                                   | 629-99-2 | 2500 | 2500 | trace       | trace        |
| Pinostrobin chalcone, di-TMS                            | N/A      | 2506 | 2508 | 0.26        | 0.04         |
| Pinostrobin, mono-TMS                                   | N/A      | 2512 | 2512 | 0.66        | 0.84         |
| Benzyl ( <i>E</i> )- <i>p</i> -coumarate, mono-TMS      | N/A      | 2516 | 2515 | 3.78        | 0.37         |
| 1- <i>p</i> -Coumaroyl glycerol, tri-TMS                | N/A      | 2528 | 2528 | 0.06        | -            |
| Pinocembrin chalcone, tri-TMS                           | N/A      | 2542 | 2541 | 0.09        | 0.08         |
| Pinocembrin, di-TMS                                     | N/A      | 2551 | 2552 | <b>6.93</b> | <b>14.10</b> |
| NN (73,75,121,81,95,143...)                             | -        | 2555 | -    | -           | 0.05         |
| NN (303>73,95,147,213,225)                              | -        | 2563 | -    | -           | 0.81         |
| NN (262,73,247,460,375)                                 | -        | 2569 | -    | -           | 0.09         |
| 2-Acetyl-1- <i>p</i> -coumaroyl glycerol, di-TMS        | N/A      | 2578 | 2578 | 0.12        | -            |
| 1-Acetyl-3- <i>p</i> -coumaroyl glycerol, di-TMS        | N/A      | 2581 | 2580 | 0.19        | -            |
| Chalcone, TMS? (192,73,311,238)                         | N/A      | 2586 | -    | trace       | 0.26         |
| 2-Phenylethyl <i>p</i> -coumarate, mono-TMS             | N/A      | 2603 | 2603 | 1.02        | 0.11         |
| Pinobanksin, tri-TMS                                    | N/A      | 2613 | 2611 | <b>4.25</b> | <b>4.73</b>  |
| 3-Hydroxyeicosanoic acid, di-TMS                        | N/A      | 2623 | 2620 | -           | 0.03         |
| Pinobanksin 3-acetate, mono-TMS                         | N/A      | 2634 | 2632 | <b>1.26</b> | 0.21         |
| Coniferyl benzoate, mono-TMS                            | N/A      | 2637 | 2640 | trace       | -            |
| Chrysin, mono-TMS                                       | N/A      | 2655 | 2648 | <b>1.95</b> | <b>0.42</b>  |
| Benzyl ( <i>E</i> )-isoferulate, mono-TMS               | N/A      | 2659 | 2659 | -           | 0.26         |
| 2',6'-Dihydroxy-4,4'-dimethoxydihydrochalcone           | N/A      | 2659 | 2659 | trace       |              |
| NN (238,385,325,73,43,341)                              | -        | 2666 | -    | 0.34        | 0.21         |
| Pinobanksin x-acetate, TMS? (296,443,73,383)            | -        | 2671 | -    | -           | 0.58         |

|                                                       |            |      |      |              |             |
|-------------------------------------------------------|------------|------|------|--------------|-------------|
| 5,7-Dihydroxy-3-methoxyflavanone                      | N/A        | 2675 | 2673 | <b>2.02</b>  | <b>2.04</b> |
| Benzyl (E)-ferulate, mono-TMS                         | N/A        | 2680 | 2680 | 1.64         | 0.45        |
| Pinobanksin 3-acetate, di-TMS                         | N/A        | 2694 | 2693 | <b>10.01</b> | <b>9.00</b> |
| NN (325>>282,155,73)                                  | -          | 2706 | -    | 0.14         | 0.85        |
| Sucrose, octa-TMS                                     | 19159-25-2 | 2714 | 2714 | 0.25         | 0.33        |
| Galangin, di-TMS                                      | N/A        | 2719 | 2717 | trace        | trace       |
| Benzyl (E)-caffeate, di-TMS                           | N/A        | 2723 | 2722 | 3.79         | 2.70        |
| 2',6',4-Trihydroxy-4'-methoxydihydrochalcone, tri-TMS | N/A        | 2636 | 2637 | 0.14         | -           |
| Pinobanksin 3-propanoate, di-TMS                      | N/A        | 2737 | -    | -            | 0.06        |
| Isosakuranetin, mono-TMS                              | N/A        | 2740 | 2742 | trace        | -           |
| Chrysin, di-TMS                                       | N/A        | 2746 | 2745 | <b>5.33</b>  | <b>5.73</b> |
| 5,7-Dihydroxy-3-methoxyflavone, di-TMS                | N/A        | 2755 | 2750 | 0.67         | 0.60        |
| 1-Acetyl-3-caffeoyl glycerol, tri-TMS                 | N/A        | 2761 | 2768 | 0.06         | -           |
| Galangin, tri-TMS                                     | N/A        | 2767 | 2769 | <b>8.95</b>  | <b>9.60</b> |
| Disaccharide, TMS                                     | -          | 2775 | -    | -            | 0.12        |
| Pinobanksin 3-isobutanoate, di-TMS                    | N/A        | 2788 | 2791 | 0.52         | 0.51        |
| β-Maltose, octa-TMS                                   | N/A        | 2797 | 2800 | 0.07         | 0.14        |
| CAPE, di-TMS                                          | N/A        | 2805 | 2805 | <b>1.29</b>  | <b>1.15</b> |
| Isosakuranetin, di-TMS + disaccharide                 | -          | 2816 | 2820 | <b>1.34</b>  | -           |
| Isosakuranetin, di-TMS                                | N/A        | 2816 | 2820 | -            | 0.18        |
| Dihydroxymethoxyflavone, di-TMS                       | -          | 2821 | 2820 | 0.39         | 0.40        |
| Cinnamyl (E)- <i>p</i> -coumarate, mono-TMS           | N/A        | 2836 | 2833 | <b>1.91</b>  | 0.23        |
| Tetracosanoic acid, mono-TMS                          | 74367-37-6 | 2844 | 2845 | 0.53         | -           |
| Pinobanksin-3- <i>n</i> -butanoate, di-TMS            | N/A        | 2848 | 2849 | 0.17         | 0.13        |
| Disaccharide, TMS (73,361,217)                        | -          | 2857 | -    | -            | 0.09        |
| Sakuranetin chalcone, tri-TMS                         | N/A        | 2871 | 2871 | -            | 0.05        |
| Sakuranetin , di-TMS                                  | N/A        | 2877 | 2880 | 0.55         | 0.05        |
| Pinobanksin 5-pentanoate, di-TMS                      | N/A        | 2885 | 2884 | 0.19         | 0.58        |
| β-Cellobiose, octa-TMS                                | N/A        | 2889 | 2888 | -            | 0.12        |

|                                                    |           |      |      |      |      |
|----------------------------------------------------|-----------|------|------|------|------|
| Naringenin, tri-TMS                                | N/A       | 2895 | 2895 | 0.23 | 0.06 |
| NN (191,117,91)                                    | -         | 2933 | -    | -    | 0.03 |
| Disaccharide, TMS (204,73,361)                     | -         | 2956 | -    | -    | 0.03 |
| Pinobanksin 5-pentenoate, di-TMS                   | N/A       | 2965 | 2964 | -    | 0.03 |
| NN (73,299,305,147,129,233...445)                  | -         | 2968 | -    | -    | 0.05 |
| Cinnamyl (E)-isoferulate, mono-TMS                 | N/A       | 2980 | 2975 | -    | 0.56 |
| Cinnamyl (E)-ferulate, mono-TMS                    | N/A       | 2990 | 2997 | 0.09 | -    |
| NN (356,341,75,135)                                | -         | 2995 | -    | 0.26 | -    |
| $\beta$ -Isomaltose, octa-TMS                      | N/A       | 3005 | 3005 | -    | 0.05 |
| 3,5,7-Trihydroxy-4'-methoxyflavone, tri-TMS        | N/A       | 3015 | 3015 | 0.31 | -    |
| Pinobanksin 3-hexanoate, di-TMS                    | N/A       | 3037 | 3032 | -    | 0.04 |
| Cinnamyl (E)-caffeate, di-TMS                      | N/A       | 3044 | 3043 | 0.41 | 0.96 |
| Kaempferide, tri-TMS                               | N/A       | 3052 | 3050 | 0.33 | 0.02 |
| 9-Hentriacontene                                   | -         | 3076 | 3075 | 0.14 | -    |
| Kaempferol, tri-TMS                                | N/A       | 3082 | 3078 | 0.29 | 0.04 |
| NN (414,399)                                       | -         | 3086 | -    | 0.41 | 0.03 |
| NN (444,401,73,429)                                | -         | 3096 | -    | 0.18 | 0.02 |
| 3',4',7-Trihydroxyisoflavone, tri-TMS              | N/A       | 3101 | 3098 | 0.14 | 0.09 |
| Kaempferol, tetra-TMS                              | N/A       | 3114 | 3114 | 0.38 | 0.41 |
| NN (341,73,103,143...475,515)                      | -         | 3121 | -    | -    | 0.05 |
| 5,7,4'-Trimethyl-3-methoxyflavone, tri-TMS         | N/A       | 3141 | 3139 | -    | 0.09 |
| Apigenin, tri-TMS                                  | N/A       | 3163 | 3161 | -    | 0.09 |
| Triterpenoid (189,73,129,143,305)                  | -         | 3180 | -    | -    | 0.08 |
| Quercetine, penta-TMS                              | 4067-66-7 | 3218 | 3213 | 0.11 | -    |
| Isorhamnetin, tetra-TMS                            | N/A       | 3245 | 3245 | -    | 0.22 |
| <i>p</i> -Coumatate or ferulate, TMS (219,205,249) | N/A       | 3249 | -    | 0.21 | -    |
| NN (73,271,301,103,129,147...451,531)              | -         | 3259 | -    | -    | 0.11 |
| 7-Tritriacontene                                   | N/A       | 3283 | 3282 | 0.22 | -    |
| Myricetin, hexa-TMS                                | N/A       | 3303 | 3303 | -    | 0.04 |
| Triterpenoid, TMS (73,189,271,375,129,143)         | -         | 3311 | -    | 0.28 | 0.14 |

|                                                       |     |      |      |        |        |
|-------------------------------------------------------|-----|------|------|--------|--------|
| NN (73,301,299,461)                                   | -   | 3436 | -    | -      | 0.11   |
| Triterpenoid, TMS (189,73)                            | -   | 3497 | -    | -      | 0.11   |
| NN (393,207,73,134,129)                               | -   | 3574 | -    | -      | 0.22   |
| 1,3-Di- <i>p</i> -coumaroyl glycerol, tri-TMS         | N/A | 3869 | 3869 | 0.02   | -      |
| 2-Acetyl-1,3-di- <i>p</i> -coumaroyl glycerol, di-RMS | N/A | 3963 | 3963 | 0.89   | -      |
| Total                                                 |     |      |      | 100.00 | 100.00 |

\* trace – below 0.01% of the total ion current. \*\* N/A - not available
